# Supplementary material for: Single-cell m6A mapping in vivo using picoMeRIP–seq
Source: PubMed Central journal article supplement (PMC10739642; doi:10.1038/s41587-023-01831-7), 2023-06-22
Supplement: NIHMS1911563-supplement-Source_Data_Extended_Data_Fig__4.pdf [file NIHMS1911563-supplement-Source_Data_Extended_Data_Fig__4.pdf]

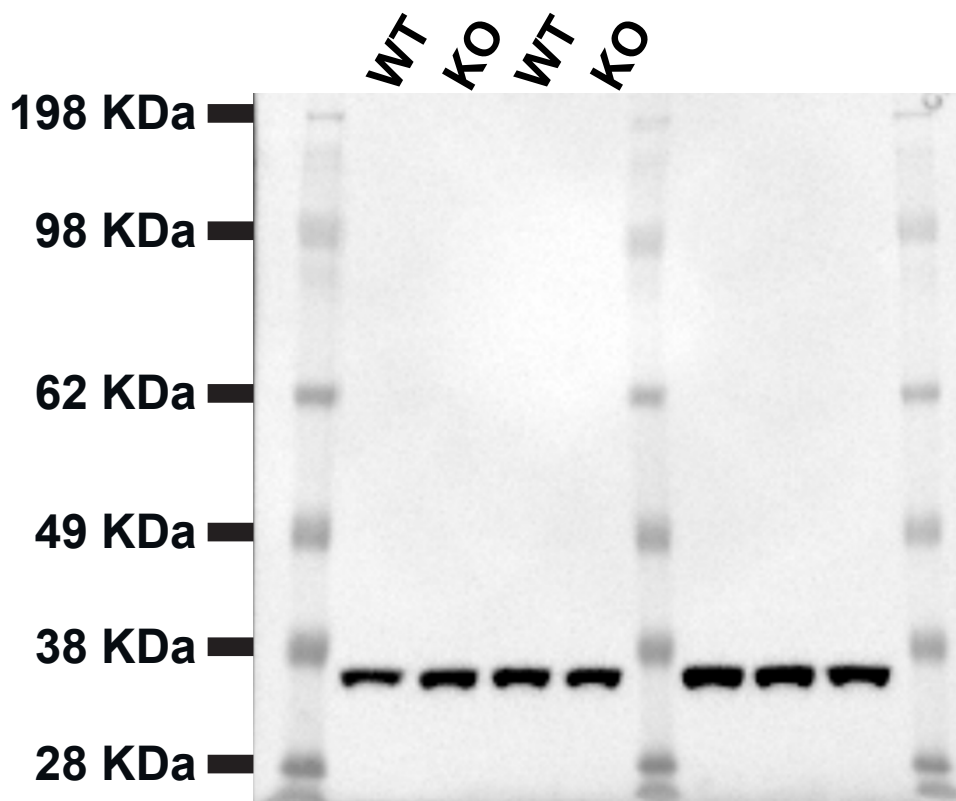

Raw blot: GAPDH

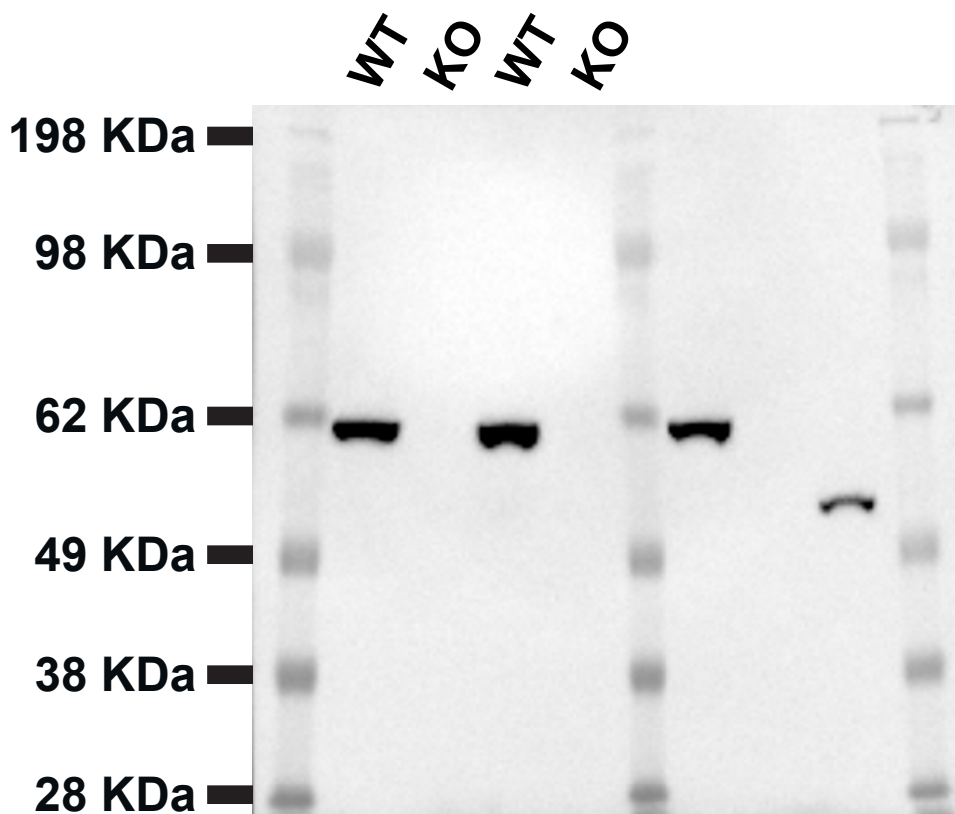

Raw blot: METTL3
